# Supplementary material
Source: publisher figshare collection journal article supplement (https://tandf.figshare.com/ndownloader/files/3673752)

## Supplementary Information

### **A Novel and Potent Lewis Acid Catalyst: Br<sub>2</sub>-Catalyzed Friedel–Crafts Type Reactions of Naphthols with Aldehydes**

Deqiang Liang,<sup>\*,a</sup> Jingjing Li,<sup>a</sup> Yanni Li,<sup>\*,a</sup> Baoling Wang,<sup>a</sup> Ping Cheng,<sup>b</sup> Sha Luo<sup>a</sup>

<sup>a</sup> Department of Chemistry, Kunming University, Kunming 650214, China

<sup>b</sup> School of Environmental and Chemical Engineering, Shanghai University, Shanghai  
200444, China

E-mail: [ldq5871@126.com](mailto:ldq5871@126.com); [suliyn@163.com](mailto:suliyn@163.com)

#### **Table of Contents**

|                                                                                     |            |
|-------------------------------------------------------------------------------------|------------|
| <b>I. General information.....</b>                                                  | <b>S2</b>  |
| <b>II. General procedure.....</b>                                                   | <b>S2</b>  |
| <b>III. Spectral data of new compounds.....</b>                                     | <b>S3</b>  |
| <b>IV. Computational details.....</b>                                               | <b>S6</b>  |
| <b>Table S1</b> NPA and MA charges on the carbonyl carbon at different methods..... | <b>S6</b>  |
| Coordinates of all optimized geometries.....                                        | <b>S7</b>  |
| <b>V. Copies of NMR spectra for new compounds.....</b>                              | <b>S14</b> |

## I. General information

Chemicals were all purchased from commercial sources and used without treatment. Thin-layer chromatography (TLC) was carried out using silica gel GF254 plates. Products were purified by column chromatography over silica gel.  $^1\text{H}$  NMR and  $^{13}\text{C}$  NMR spectra were recorded at 25 °C on a Bruker Ascend<sup>TM</sup> 400 spectrometer in  $\text{CDCl}_3/\text{DMSO}$  using TMS as internal standard. High-resolution mass spectra (HRMS) were obtained using a Bruker microTOF II Focus spectrometer (ESI).

Optimization of all molecular geometries, vibrational analyses and Mulliken atomic (MA) charges were calculated at B3LYP<sup>1</sup> and M06-2X<sup>2</sup> functions with the 6-31+G(d,p)<sup>3</sup> and def2-TZVP<sup>4</sup> basis sets by using Gaussian 09 program. A natural bonding orbital (NBO) analysis for structures was also performed to determine the natural population atomic (NPA) charges by using the NBO 3.1 package implemented in Gaussian 09. All calculated structures were true minima (i.e., no imaginary frequencies). Solvent effect at M06-2X/def2-TZVP level was calculated using the solvent model density (SMD) approach.<sup>5</sup>

## II. General procedure

**3b as example:** To a stirred solution of  $\beta$ -naphthol **1a** (144 mg, 1.0 mmol) and 3-nitrobenzaldehyde **2b** (83 mg, 0.55 mmol) in  $\text{CH}_2\text{Cl}_2$  (4.0 mL) was added a solution of  $\text{Br}_2$  (0.0051 mL) in  $\text{CH}_2\text{Cl}_2$  (1.0 mL), and the mixture was stirred for 12 h at ambient temperature. After **1a** was consumed, as indicated by TLC, the reaction mixture was quenched with saturated aqueous  $\text{Na}_2\text{S}_2\text{O}_3$  (0.5 mL) and water (20.0 mL), and extracted with  $\text{CH}_2\text{Cl}_2$  four times. The residue obtained after evaporation of the solvent was purified by column chromatography on silica gel (petroleum ether–ethyl acetate = 12:1, v/v) to afford benzylidene biphenol **3b** as an offwhite solid (202 mg, 96% yield).

---

<sup>1</sup> Stephens, P. J.; Devlin, F. J.; Chabalowski, C. F.; Frisch, M. J. *J. Phys. Chem.* **1994**, *98*, 11623.

<sup>2</sup> Zhao, Y.; Truhlar, D. G. *Theor. Chem. Acc.* **2008**, *120*, 215.

<sup>3</sup> Petersson, G. A.; Bennett, A.; Tensfeldt, T. G.; Al-Laham, M. A.; Shirley, W. A.; Mantzaris, J. *J. Chem. Phys.* **1988**, *89*, 2193.

<sup>4</sup> Weigend, F.; Ahlrichs, R. *Phys. Chem. Chem. Phys.* **2005**, *7*, 3297.

<sup>5</sup> Marenich, A. V.; Cramer, C. J.; Truhlar, D. G. *J. Phys. Chem. B* **2009**, *113*, 6378.

### III. Spectral data of new compounds

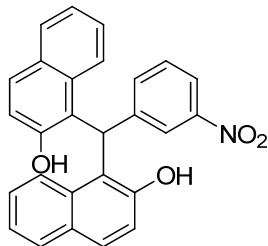

**3b**, 1,1'-((3-nitrophenyl)methylene)dinaphthalen-2-ol, offwhite solid: mp 174-175 °C (dec.).  $^1\text{H}$  NMR (400 MHz, DMSO)  $\delta$  = 7.10-7.25 (m, 7H), 7.48 (d,  $J$  = 4.9 Hz, 2H), 7.70 (d,  $J$  = 8.9 Hz, 2H), 7.74 (d,  $J$  = 7.7 Hz, 2H), 7.83 (s, 1H), 8.00-8.03 (m, 1H), 8.13 (d,  $J$  = 8.5 Hz, 2H), 10.39 (bs, 2H);  $^{13}\text{C}$  NMR (100 MHz, DMSO)  $\delta$  = 154.0, 148.0, 147.7, 135.5, 134.5, 129.4, 128.93, 128.86, 126.5, 123.7, 123.0, 122.5, 120.5, 119.9, 119.5, 41.7; HRMS (ESI-TOF) Calcd for  $\text{C}_{27}\text{H}_{20}\text{NO}_4^+$  ( $[\text{M}+\text{H}]^+$ ) 422.1387. Found 422.1393.

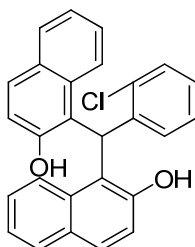

**3d**, 1,1'-((2-chlorophenyl)methylene)dinaphthalen-2-ol, pinkish solid: mp 200-201 °C (dec.).  $^1\text{H}$  NMR (400 MHz,  $\text{CDCl}_3$ )  $\delta$  = 5.50 (bs, 1H), 6.61 (bs, 1H), 6.96 (d,  $J$  = 8.8 Hz, 1H), 7.04 (d,  $J$  = 8.8 Hz, 1H), 7.14-7.18 (m, 2H), 7.20-7.25 (m, 3H), 7.27-7.29 (m, 1H), 7.40 (dd,  $J$  = 7.3, 7.5 Hz, 1H), 7.47 (dd,  $J$  = 1.0, 7.9 Hz, 1H), 7.53 (dd,  $J$  = 7.9, 7.4 Hz, 1H), 7.69-7.75 (m, 4H), 7.85 (d,  $J$  = 8.0 Hz, 1H), 7.97 (d,  $J$  = 8.6 Hz, 1H);  $^{13}\text{C}$  NMR (100 MHz, DMSO)  $\delta$  = 153.5, 152.6, 142.7, 134.6, 134.4, 133.9, 131.0, 129.2, 129.1, 128.9, 128.85, 128.76, 127.2, 126.7, 126.5, 126.1, 124.9, 123.4, 122.6, 122.4, 121.2, 119.3, 118.8, 118.7, 110.0, 40.5; HRMS (ESI-TOF) Calcd for  $\text{C}_{27}\text{H}_{20}\text{ClO}_2^+$  ( $[\text{M}+\text{H}]^+$ ) 411.1146. Found 411.1150.

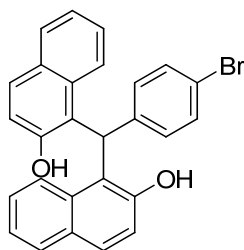

**3e**, 1,1'-((4-bromophenyl)methylene)dinaphthalen-2-ol, yellowish crystal: 192-193 °C (dec.).  $^1\text{H}$  NMR (400 MHz,  $\text{CDCl}_3$ )  $\delta$  = 6.25 (bs, 2H), 7.01 (s, 1H), 7.02 (d,  $J$  = 7.9 Hz, 2H), 7.08 (d,  $J$  = 8.3 Hz, 2H), 7.33-7.42 (m, 6H), 7.72 (d,  $J$  = 8.8 Hz, 2H), 7.81 (dd,  $J$  = 1.5, 7.7 Hz, 2H), 7.88 (d,  $J$  = 8.4 Hz, 2H);  $^{13}\text{C}$  NMR (100 MHz, DMSO)  $\delta$  = 153.0, 144.4, 134.5, 130.9, 130.8, 129.14, 129.05, 128.8, 126.3, 124.3, 122.6, 120.3, 119.3, 118.3, 41.4; HRMS (ESI-TOF) Calcd for  $\text{C}_{27}\text{H}_{20}\text{BrO}_2^+$  ( $[\text{M}+\text{H}]^+$ ) 455.0641. Found 455.0639.

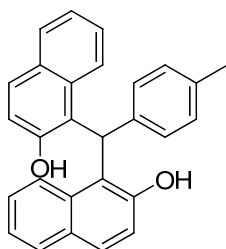

**3g**, 1,1'-((p-tolyl)methylene)dinaphthalen-2-ol, yellowish solid: 177-178 °C (dec.).  $^1\text{H}$  NMR (400 MHz, DMSO)  $\delta$  = 2.24 (s, 3H), 6.88 (d,  $J$  = 8.0 Hz, 2H), 6.98 (d,  $J$  = 8.6 Hz, 2H), 6.99 (s, 1H), 7.13 (d,  $J$  = 8.8 Hz, 2H), 7.15-7.23 (m, 4H), 7.68 (d,  $J$  = 8.8 Hz, 2H), 7.72 (dd,  $J$  = 1.8, 7.6 Hz, 2H), 8.10 (d,  $J$  = 8.2 Hz, 2H), 9.72 (bs, 2H);  $^{13}\text{C}$  NMR (100 MHz, DMSO)  $\delta$  = 153.1, 141.3, 134.6, 134.3, 129.1, 128.9, 128.85, 128.81, 128.5, 126.3, 124.4, 122.6, 120.9, 119.4, 41.5, 21.0; HRMS (ESI-TOF) Calcd for  $\text{C}_{28}\text{H}_{23}\text{O}_2^+$  ( $[\text{M}+\text{H}]^+$ ) 391.1693. Found 391.1696.

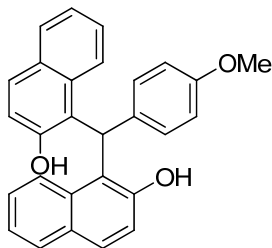

**3h**, 1,1'-((4-methoxyphenyl)methylene)dinaphthalen-2-ol, offwhite crystal: 195-196 °C (dec.).  $^1\text{H}$  NMR (400 MHz, DMSO)  $\delta$  = 3.68 (s, 3H), 6.75 (d,  $J$  = 8.7 Hz, 2H), 6.91 (d,  $J$  = 8.5 Hz, 2H), 6.97 (s, 1H), 7.12 (d,  $J$  = 8.8 Hz, 2H), 7.16-7.23 (m,

4H), 7.68 (d,  $J = 8.9$  Hz, 2H), 7.72 (dd,  $J = 1.5, 7.4$  Hz, 2H), 8.09 (d,  $J = 8.4$  Hz, 2H), 9.69 (bs, 2H);  $^{13}\text{C}$  NMR (100 MHz, DMSO)  $\delta = 157.4, 153.1, 136.1, 134.6, 129.5, 129.1, 128.89, 128.85, 126.2, 124.4, 122.6, 121.0, 119.4, 113.6, 55.3, 41.1$ ; HRMS (ESI-TOF) Calcd for  $\text{C}_{28}\text{H}_{23}\text{O}_3^+$  ( $[\text{M}+\text{H}]^+$ ) 407.1642. Found 407.1644.

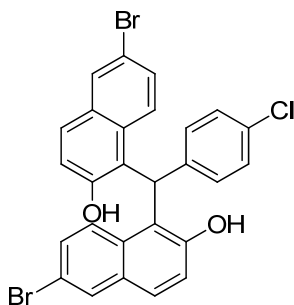

**3k**, 1,1'-((4-chlorophenyl)methylene)bis(6-bromonaphthalen-2-ol), pinkish solid: 245-246 °C (dec.).  $^1\text{H}$  NMR (400 MHz, DMSO)  $\delta = 6.96$  (d,  $J = 7.0$  Hz, 2H), 6.99 (s, 1H), 7.19 (d,  $J = 8.8$  Hz, 2H), 7.24 (d,  $J = 8.5$  Hz, 2H), 7.31 (dd,  $J = 2.2, 9.3$  Hz, 2H), 7.70 (d,  $J = 8.9$  Hz, 2H), 7.97 (d,  $J = 9.4$  Hz, 2H), 8.00 (d,  $J = 2.1$  Hz, 2H), 10.08 (s, 2H);  $^{13}\text{C}$  NMR (100 MHz, DMSO)  $\delta = 153.7, 143.2, 133.1, 130.5, 130.4, 130.1, 128.9, 128.6, 128.1, 126.9, 120.6, 120.4, 115.6, 41.2$ ; HRMS (ESI-TOF) Calcd for  $\text{C}_{27}\text{H}_{18}\text{Br}_2\text{ClO}_2^+$  ( $[\text{M}+\text{H}]^+$ ) 566.9357. Found 566.9357.

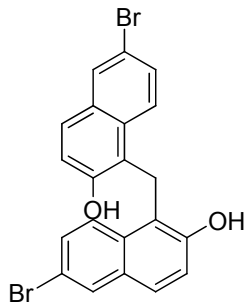

**3l**, 1,1'-methylenebis(6-bromonaphthalen-2-ol), offwhite solid: mp 248-249 °C (dec.).  $^1\text{H}$  NMR (400 MHz, DMSO)  $\delta = 4.68$  (s, 2H), 7.29 (dd,  $J = 2.2, 9.2$  Hz, 2H), 7.31 (d,  $J = 8.8$  Hz, 2H), 7.62 (d,  $J = 8.9$  Hz, 2H), 7.93 (d,  $J = 2.1$  Hz, 2H), 8.10 (d,  $J = 9.2$  Hz, 2H), 10.41 (s, 2H);  $^{13}\text{C}$  NMR (100 MHz, DMSO)  $\delta = 152.8, 132.6, 130.3, 130.2, 128.7, 127.4, 126.4, 119.9, 119.7, 115.6, 20.7$ ; HRMS (ESI-TOF) Calcd for  $\text{C}_{21}\text{H}_{15}\text{Br}_2\text{O}_2^+$  ( $[\text{M}+\text{H}]^+$ ) 456.9433. Found 456.9432.

## IV. Computational details

**Table S1** NPA and MA charges on the carbonyl carbon at different methods

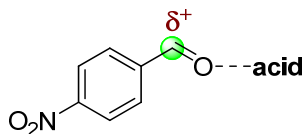

| Acid                           | B3LYP/6-31+G(d,p) |                | B3LYP/def2-TZVP |      | M062X/def2-TZVP          |                          |
|--------------------------------|-------------------|----------------|-----------------|------|--------------------------|--------------------------|
|                                | MA                | NPA            | MA              | NPA  | MA                       | NPA                      |
| Br <sub>2</sub>                | 0.31              | 0.41           | 0.12            | 0.42 | 0.12 (0.17) <sup>a</sup> | 0.43 (0.45) <sup>a</sup> |
| Br <sup>+</sup>                | 0.39              | 0.43           | 0.21            | 0.43 | 0.25 (0.32) <sup>a</sup> | 0.48 (0.51) <sup>a</sup> |
| I <sub>2</sub>                 | – <sup>b</sup>    | – <sup>b</sup> | 0.13            | 0.42 | 0.13 (0.16) <sup>a</sup> | 0.44 (0.45) <sup>a</sup> |
| HBr                            | 0.09              | 0.41           | 0.11            | 0.42 | 0.12 (0.18) <sup>a</sup> | 0.43 (0.47) <sup>a</sup> |
| HI                             | – <sup>b</sup>    | – <sup>b</sup> | 0.11            | 0.42 | 0.12 (0.15) <sup>a</sup> | 0.43 (0.44) <sup>a</sup> |
| H <sub>2</sub> SO <sub>4</sub> | 0.34              | 0.42           | 0.13            | 0.43 | 0.16 (0.21) <sup>a</sup> | 0.45 (0.48) <sup>a</sup> |
| TfOH                           | 0.27              | 0.42           | 0.13            | 0.43 | 0.16 (0.22) <sup>a</sup> | 0.46 (0.49) <sup>a</sup> |
| H <sup>+</sup>                 | 0.45              | 0.43           | 0.19            | 0.45 | 0.21 (0.27) <sup>a</sup> | 0.49 (0.54) <sup>a</sup> |
| BF <sub>3</sub>                | 0.27              | 0.44           | 0.15            | 0.46 | 0.19 (0.28) <sup>a</sup> | 0.48 (0.53) <sup>a</sup> |
| FeCl <sub>3</sub>              | 0.22              | 0.45           | 0.21            | 0.46 | 0.26 (0.33) <sup>a</sup> | 0.49 (0.52) <sup>a</sup> |
| No acid                        | 0.19              | 0.39           | 0.09            | 0.41 | 0.09 (0.11) <sup>a</sup> | 0.42 (0.43) <sup>a</sup> |

<sup>a</sup> Solvent effect was considered, and MeCN served as the solvent.

<sup>b</sup> This approach does not apply to I<sub>2</sub> or HI.

**Coordinates of all optimized geometries (taking calculations at the M06-2X/def2-TZVP level as example)**

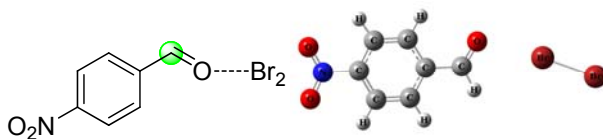

|    |             |             |             |
|----|-------------|-------------|-------------|
| C  | -0.43484600 | 0.40712000  | -0.13819700 |
| C  | 0.93051500  | 0.58116800  | 0.02491900  |
| C  | 1.52656400  | 1.82234500  | 0.14214600  |
| C  | 0.70996900  | 2.94121400  | 0.09529600  |
| C  | -0.66284800 | 2.79659100  | -0.06778100 |
| C  | -1.23606600 | 1.53198400  | -0.18521900 |
| H  | -0.84013300 | -0.59030000 | -0.22380500 |
| H  | 2.59681600  | 1.89505600  | 0.26695700  |
| H  | 1.14105000  | 3.93110200  | 0.18720700  |
| H  | -2.30803000 | 1.45105400  | -0.30970600 |
| N  | 1.79342900  | -0.62142100 | 0.07694600  |
| O  | 2.98103200  | -0.44638300 | 0.21319200  |
| O  | 1.25158800  | -1.69651600 | -0.02034700 |
| C  | -1.51956300 | 4.00530000  | -0.10691700 |
| H  | -0.99447300 | 4.97034500  | 0.01286400  |
| O  | -2.71349800 | 3.97022200  | -0.25470800 |
| Br | -3.68976900 | 6.54332800  | 0.03002500  |
| Br | -4.27327400 | 8.75009500  | 0.30242700  |

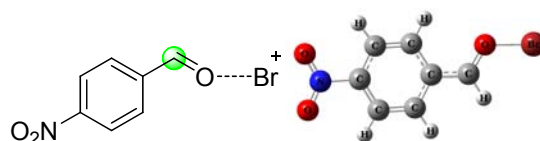

|   |             |             |             |
|---|-------------|-------------|-------------|
| C | -0.53297800 | 0.53871200  | -0.15917300 |
| C | 0.84353400  | 0.65545400  | -0.00264100 |
| C | 1.51090600  | 1.85746500  | 0.15710600  |
| C | 0.75813600  | 3.01393400  | 0.16192100  |
| C | -0.63894600 | 2.93209300  | 0.00595400  |
| C | -1.28564200 | 1.68902700  | -0.15553100 |
| H | -0.97623100 | -0.43982900 | -0.27841700 |
| H | 2.58530600  | 1.86593000  | 0.27310900  |

|    |             |             |             |
|----|-------------|-------------|-------------|
| H  | 1.23849300  | 3.97698700  | 0.28579500  |
| H  | -2.36021000 | 1.64441200  | -0.27337300 |
| N  | 1.65423400  | -0.59980900 | -0.00680200 |
| O  | 2.84320200  | -0.46930600 | 0.11979700  |
| O  | 1.04501300  | -1.62904200 | -0.13642000 |
| C  | -1.36065600 | 4.14554000  | 0.02360400  |
| H  | -0.85168100 | 5.10106300  | 0.15525100  |
| O  | -2.62547100 | 4.14139400  | -0.11292900 |
| Br | -3.55448600 | 5.72563200  | -0.06967700 |

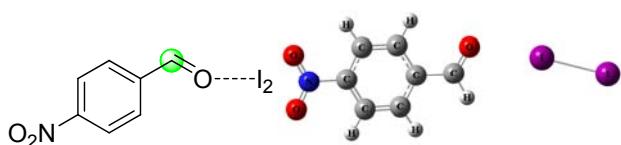

|   |             |             |             |
|---|-------------|-------------|-------------|
| C | -4.96032300 | -1.09363700 | -0.01495400 |
| C | -5.60065700 | 0.13560000  | -0.00709700 |
| C | -4.92605100 | 1.34122500  | 0.01998200  |
| C | -3.54061500 | 1.30890100  | 0.03965200  |
| C | -2.87197500 | 0.09012100  | 0.03218900  |
| C | -3.57875500 | -1.11047900 | 0.00496700  |
| H | -5.54587200 | -2.00082600 | -0.03634300 |
| H | -5.48122800 | 2.26729800  | 0.02466900  |
| H | -2.97644100 | 2.23372100  | 0.06022000  |
| H | -3.02922200 | -2.04260600 | -0.00081500 |
| N | -7.08155800 | 0.15864800  | -0.02958700 |
| O | -7.61940000 | 1.24046000  | -0.02226300 |
| O | -7.65186400 | -0.90587700 | -0.05373800 |
| C | -1.39122600 | 0.07709500  | 0.05056200  |
| H | -0.90094400 | 1.06737000  | 0.06706500  |
| O | -0.73509500 | -0.93326300 | 0.04713100  |
| I | 2.08617900  | -0.39783700 | 0.01357900  |
| I | 4.64538900  | 0.35370500  | -0.02166400 |

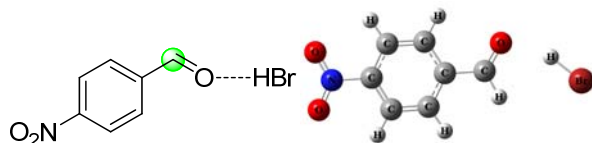



|    |             |             |             |
|----|-------------|-------------|-------------|
| C  | -0.50967800 | 0.48674400  | -0.15543200 |
| C  | 0.85600000  | 0.66366000  | 0.00160600  |
| C  | 1.44624900  | 1.90360000  | 0.15586900  |
| C  | 0.62337000  | 3.01884600  | 0.15190900  |
| C  | -0.75007900 | 2.87121600  | -0.00467100 |
| C  | -1.31767700 | 1.60766400  | -0.15789000 |
| H  | -0.91000700 | -0.50960600 | -0.27135300 |
| H  | 2.51713100  | 1.97826100  | 0.27412200  |
| H  | 1.04985600  | 4.00781200  | 0.27074700  |
| H  | -2.39004400 | 1.52420600  | -0.27691600 |
| N  | 1.72641300  | -0.53498200 | 0.00332700  |
| O  | 2.91334000  | -0.35774900 | 0.14147800  |
| O  | 1.19038700  | -1.60853700 | -0.13381700 |
| C  | -1.61129800 | 4.07502700  | -0.00700200 |
| H  | -1.09269400 | 5.04238600  | 0.12326600  |
| O  | -2.80866200 | 4.03660200  | -0.14067200 |
| H  | -3.37060300 | 5.87935300  | -0.06256400 |
| Br | -3.23765900 | 7.30764300  | 0.06040400  |

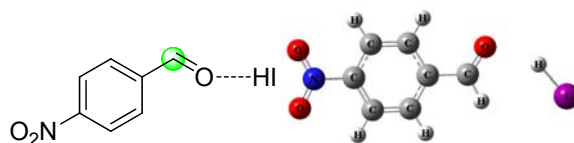

|   |             |             |             |
|---|-------------|-------------|-------------|
| C | -3.31509900 | 1.19900600  | -0.04561200 |
| C | -3.84268900 | -0.08235100 | -0.00828800 |
| C | -3.06371200 | -1.21872200 | 0.09771000  |
| C | -1.68902900 | -1.05862600 | 0.16663000  |
| C | -1.13224200 | 0.21467300  | 0.13219200  |
| C | -1.94281100 | 1.34291900  | 0.02673000  |
| H | -3.97845100 | 2.04719800  | -0.12962000 |
| H | -3.53253000 | -2.19129500 | 0.12303500  |
| H | -1.04496300 | -1.92637300 | 0.24640500  |
| H | -1.48012900 | 2.32087600  | 0.00067200  |
| N | -5.31274800 | -0.24335300 | -0.08688600 |
| O | -5.75021500 | -1.36871600 | -0.04392500 |
| O | -5.97591500 | 0.76103400  | -0.18921300 |

|   |            |             |             |
|---|------------|-------------|-------------|
| C | 0.34088500 | 0.36372800  | 0.20294600  |
| H | 0.91569800 | -0.57944900 | 0.26149800  |
| O | 0.90442000 | 1.42710100  | 0.19542300  |
| H | 2.94200300 | 0.91571800  | 0.13473400  |
| I | 4.10961300 | -0.18872300 | -0.05963500 |

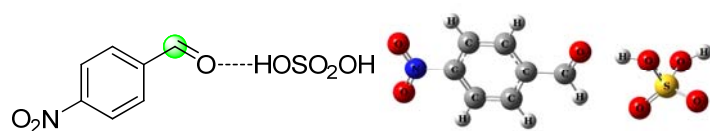

|   |             |             |             |
|---|-------------|-------------|-------------|
| C | 0.01669900  | 0.73056300  | -1.01632600 |
| C | 1.00151600  | 0.90367500  | -0.05569400 |
| C | 0.97729900  | 1.91908100  | 0.88088400  |
| C | -0.08996700 | 2.80196800  | 0.85089900  |
| C | -1.09271900 | 2.65248300  | -0.10155100 |
| C | -1.04124000 | 1.61907500  | -1.03573000 |
| H | 0.09499700  | -0.08430700 | -1.72082900 |
| H | 1.77428000  | 2.00362100  | 1.60447100  |
| H | -0.14689700 | 3.61087100  | 1.56928400  |
| H | -1.83547300 | 1.52653600  | -1.76485400 |
| N | 2.13658200  | -0.04885800 | -0.03324000 |
| O | 2.98282300  | 0.11868800  | 0.81188700  |
| O | 2.13788600  | -0.92764200 | -0.86166200 |
| C | -2.21368800 | 3.61118400  | -0.09479800 |
| H | -2.19609500 | 4.38912800  | 0.68126800  |
| O | -3.12431900 | 3.56794500  | -0.89512800 |
| H | -4.37248400 | 4.61327700  | -0.79899700 |
| O | -5.14037500 | 5.24739100  | -0.68117000 |
| S | -4.70069000 | 6.49336600  | 0.12297200  |
| O | -4.13007200 | 7.45410800  | -0.99520000 |
| O | -5.86524200 | 7.08922000  | 0.66582900  |
| O | -3.57673900 | 6.15873000  | 0.92845500  |
| H | -4.86188100 | 7.94522000  | -1.39521300 |

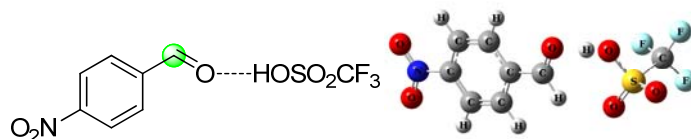

|   |             |             |             |
|---|-------------|-------------|-------------|
| C | -3.85328400 | -1.18462900 | 0.07993600  |
| C | -4.46177600 | 0.06074700  | 0.06502900  |
| C | -3.77430000 | 1.24000500  | -0.14941300 |
| C | -2.40700400 | 1.16345800  | -0.35955300 |
| C | -1.76956700 | -0.07306900 | -0.34879600 |
| C | -2.48930000 | -1.24716400 | -0.12964400 |
| H | -4.44896200 | -2.06869500 | 0.25372100  |
| H | -4.30544200 | 2.18012300  | -0.14929900 |
| H | -1.83256600 | 2.06560700  | -0.53234100 |
| H | -1.96630000 | -2.19440800 | -0.12673700 |
| N | -5.92560100 | 0.13057400  | 0.29041100  |
| O | -6.43386900 | 1.22588200  | 0.28671400  |
| O | -6.50806900 | -0.91303800 | 0.46184100  |
| C | -0.31544900 | -0.11794500 | -0.57342200 |
| H | 0.19570100  | 0.84010200  | -0.74211900 |
| O | 0.31734800  | -1.15528000 | -0.57458900 |
| H | 1.85066000  | -1.18154000 | -0.81984300 |
| O | 2.85556300  | -1.19870900 | -0.98089300 |
| S | 3.47263600  | 0.19260100  | -0.75560700 |
| O | 4.68608800  | 0.30259300  | -1.47330500 |
| O | 2.45648000  | 1.19417900  | -0.82809300 |
| C | 3.91484300  | 0.07110900  | 1.02339500  |
| F | 4.43274600  | 1.21892800  | 1.42412400  |
| F | 4.78882400  | -0.89831900 | 1.22009900  |
| F | 2.81961300  | -0.18248800 | 1.73298500  |

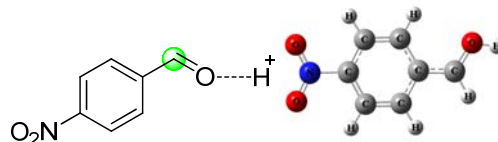

|   |             |            |             |
|---|-------------|------------|-------------|
| C | -0.54033200 | 0.54122500 | -0.15532000 |
| C | 0.83647900  | 0.66249800 | -0.00073300 |
| C | 1.50297500  | 1.86565600 | 0.16028700  |

|   |             |             |             |
|---|-------------|-------------|-------------|
| C | 0.74756100  | 3.01912000  | 0.16684500  |
| C | -0.65097700 | 2.93517400  | 0.01156500  |
| C | -1.29591300 | 1.68940800  | -0.14982100 |
| H | -0.98011800 | -0.43882200 | -0.27526300 |
| H | 2.57748700  | 1.87536100  | 0.27468100  |
| H | 1.22556900  | 3.98353000  | 0.29067800  |
| H | -2.37069200 | 1.64425000  | -0.26703000 |
| N | 1.65144700  | -0.59091900 | -0.00958500 |
| O | 2.84009100  | -0.45588900 | 0.11372200  |
| O | 1.04450900  | -1.62114800 | -0.13961700 |
| C | -1.37594100 | 4.13831900  | 0.02290000  |
| H | -0.86192800 | 5.09089100  | 0.14922000  |
| H | -3.05000600 | 5.03042400  | -0.09201300 |
| O | -2.64628900 | 4.14631300  | -0.11357500 |

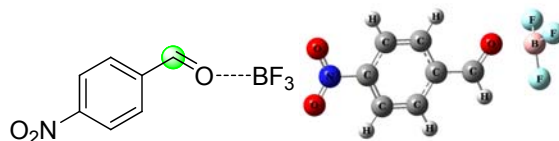

|   |             |             |             |
|---|-------------|-------------|-------------|
| C | -0.89584500 | 1.25625500  | 0.00016900  |
| C | 0.48210800  | 1.40149000  | -0.04151900 |
| C | 1.11931400  | 2.62730900  | -0.06428600 |
| C | 0.33144300  | 3.76618800  | -0.04393400 |
| C | -1.05569300 | 3.65019200  | -0.00159300 |
| C | -1.67228800 | 2.39820900  | 0.02059700  |
| H | -1.32904600 | 0.26705100  | 0.01646800  |
| H | 2.19762100  | 2.67354900  | -0.09686100 |
| H | 0.79218500  | 4.74636100  | -0.06140000 |
| H | -2.75204400 | 2.33778300  | 0.05382300  |
| N | 1.31768100  | 0.17487400  | -0.06252200 |
| O | 2.51512500  | 0.32413200  | -0.09307200 |
| O | 0.73997800  | -0.88452700 | -0.04745000 |
| C | -1.85635900 | 4.87186400  | 0.02031600  |
| H | -1.34050400 | 5.83836600  | 0.00264100  |
| O | -3.07664100 | 4.84783400  | 0.05811900  |
| B | -4.00228500 | 6.29449500  | 0.08167400  |

|   |             |            |             |
|---|-------------|------------|-------------|
| F | -4.69824900 | 6.18767800 | -1.06369800 |
| F | -4.69064600 | 6.15466600 | 1.22740900  |
| F | -3.04130300 | 7.25742500 | 0.09156700  |

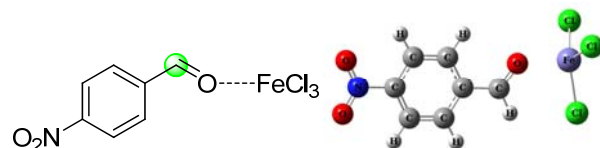

|    |             |             |             |
|----|-------------|-------------|-------------|
| C  | 3.28627800  | -1.14575400 | -0.00834700 |
| C  | 4.12833200  | -0.04431800 | -0.00321000 |
| C  | 3.67751500  | 1.26198000  | -0.00613900 |
| C  | 2.30910800  | 1.47339800  | -0.01464200 |
| C  | 1.43922700  | 0.38502800  | -0.01893000 |
| C  | 1.92331400  | -0.92460500 | -0.01577700 |
| H  | 3.70688300  | -2.14055400 | -0.00608300 |
| H  | 4.38625800  | 2.07654300  | -0.00166000 |
| H  | 1.91412700  | 2.48206500  | -0.01709100 |
| H  | 1.22432600  | -1.75045300 | -0.01917200 |
| N  | 5.59413700  | -0.28103600 | 0.00614500  |
| O  | 6.30853500  | 0.69168000  | 0.01264400  |
| O  | 5.96519200  | -1.42910000 | 0.00679100  |
| C  | 0.00402500  | 0.64531500  | -0.02434100 |
| H  | -0.33372100 | 1.68975400  | -0.03110400 |
| O  | -0.82542300 | -0.25462800 | -0.02074400 |
| Fe | -2.87447800 | -0.08229700 | 0.00264700  |
| Cl | -3.46267700 | -1.16665600 | -1.79074300 |
| Cl | -3.38666800 | -0.96257900 | 1.92666600  |
| Cl | -3.00439800 | 2.11627800  | -0.10521400 |

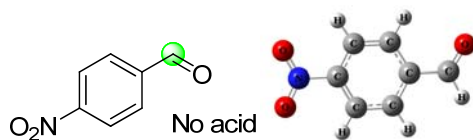

|   |             |            |             |
|---|-------------|------------|-------------|
| C | -0.52259900 | 0.53284700 | -0.15373600 |
| C | 0.85096900  | 0.63998200 | -0.00083500 |
| C | 1.50159500  | 1.84875000 | 0.15802200  |
| C | 0.73397000  | 3.00295300 | 0.16298400  |

|   |             |             |             |
|---|-------------|-------------|-------------|
| C | -0.64512500 | 2.92588700  | 0.01089500  |
| C | -1.27373500 | 1.69301600  | -0.14705600 |
| H | -0.97210100 | -0.44187800 | -0.27418100 |
| H | 2.57507200  | 1.86984400  | 0.27294600  |
| H | 1.20886000  | 3.96933000  | 0.28591600  |
| H | -2.34941400 | 1.66634200  | -0.26287800 |
| N | 1.65993200  | -0.59965000 | -0.00875400 |
| O | 2.85593700  | -0.48383400 | 0.12015600  |
| O | 1.07099000  | -1.64590800 | -0.14366300 |
| C | -1.45293300 | 4.17487600  | 0.01708100  |
| H | -0.87379900 | 5.10849000  | 0.14952200  |
| O | -2.64507500 | 4.19831600  | -0.11038900 |

## V. Copies of NMR spectra for new compounds

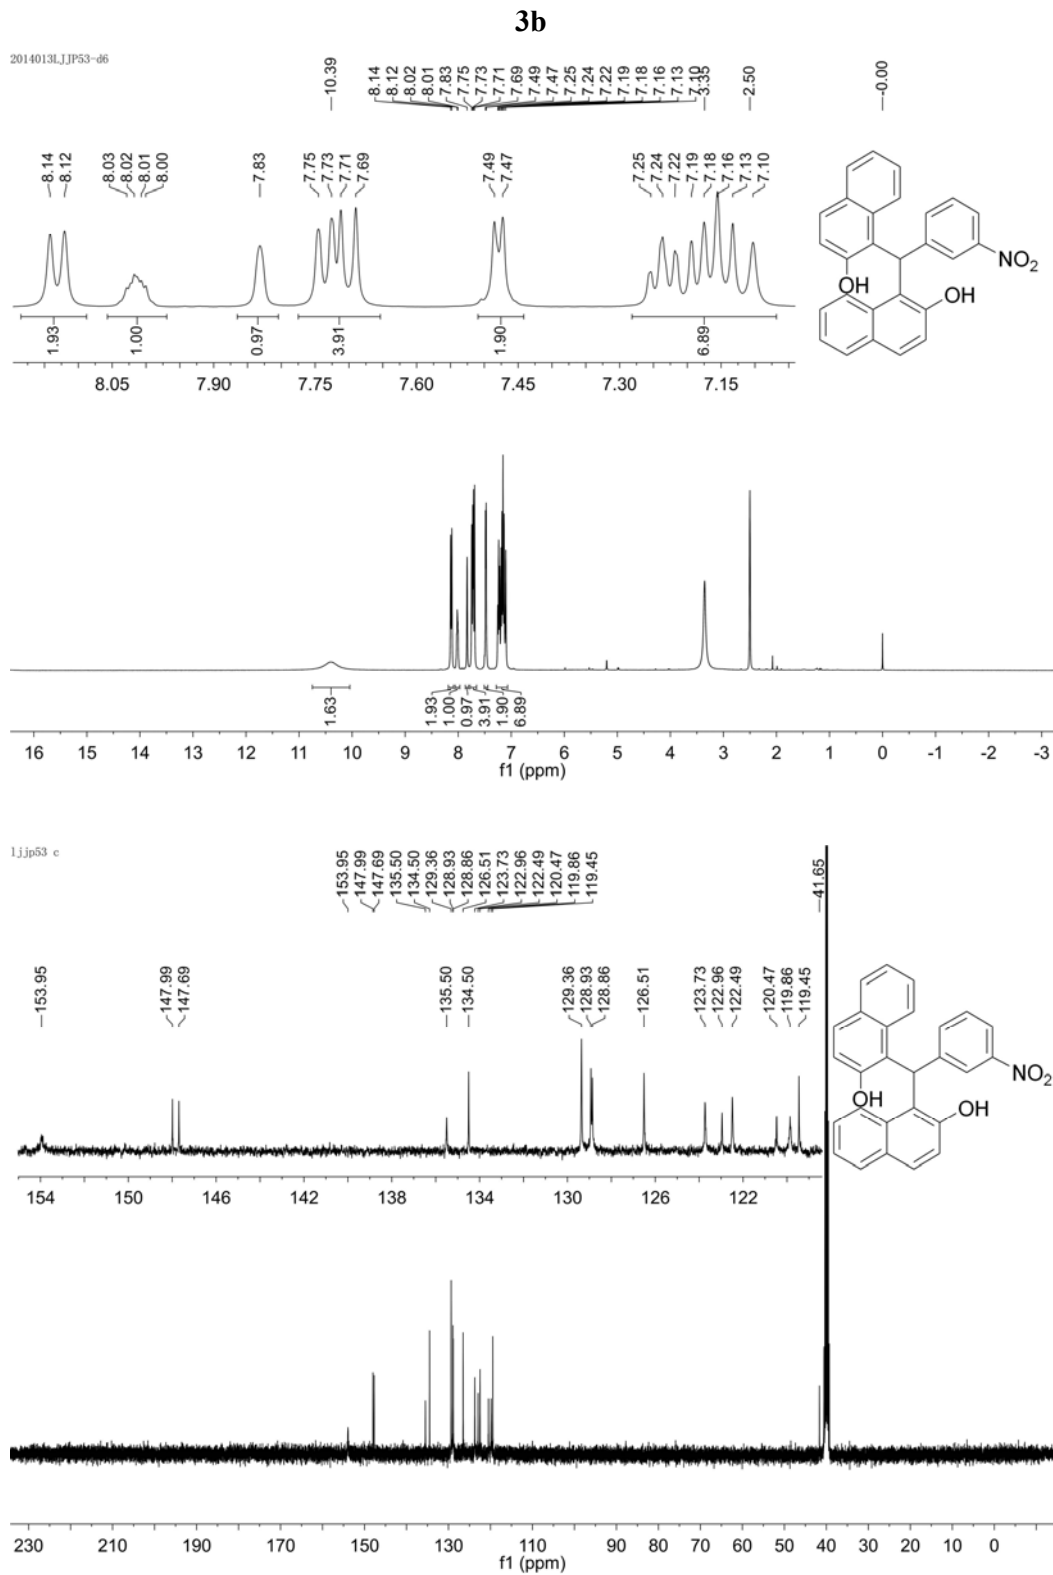

3d

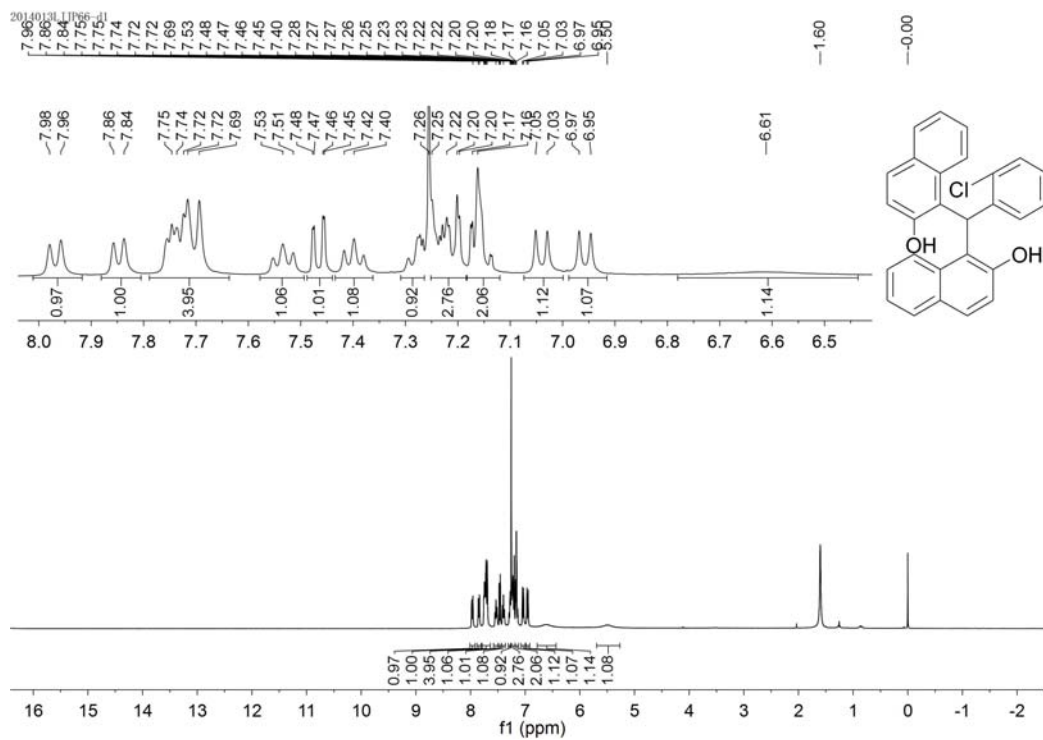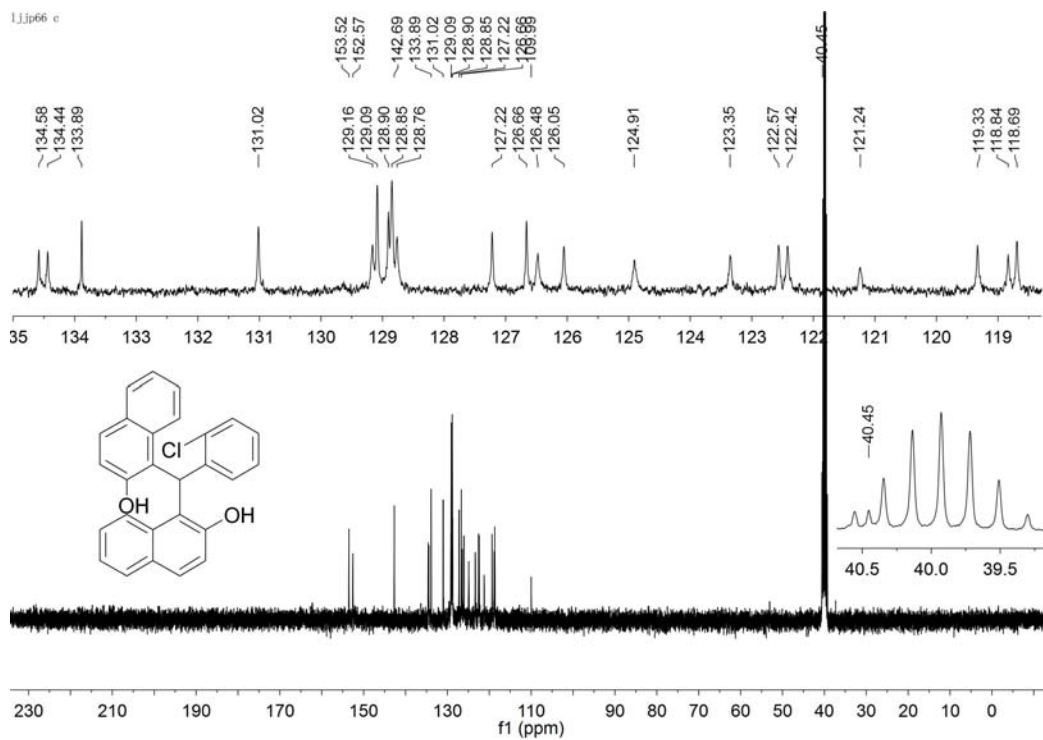



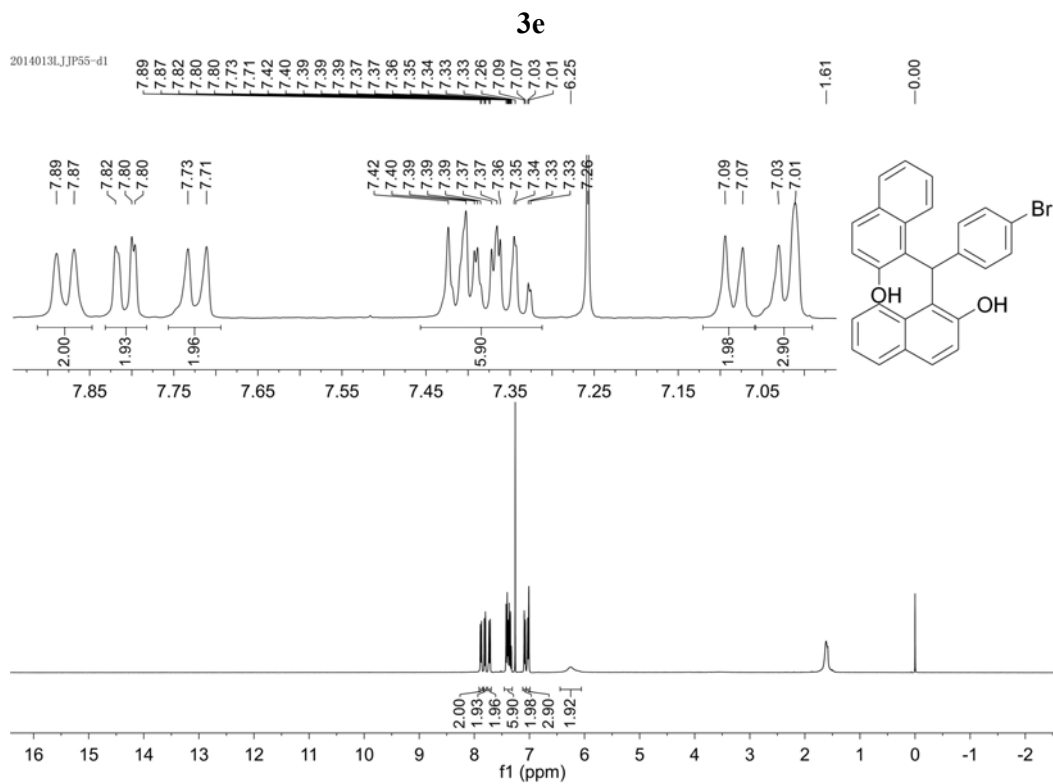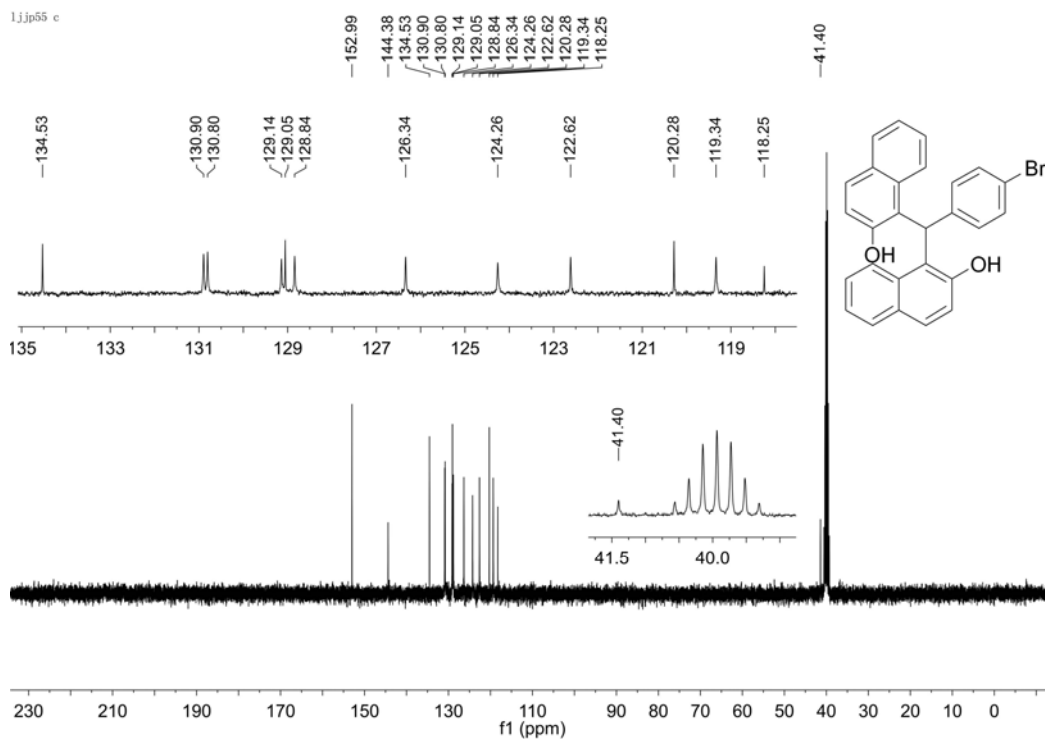

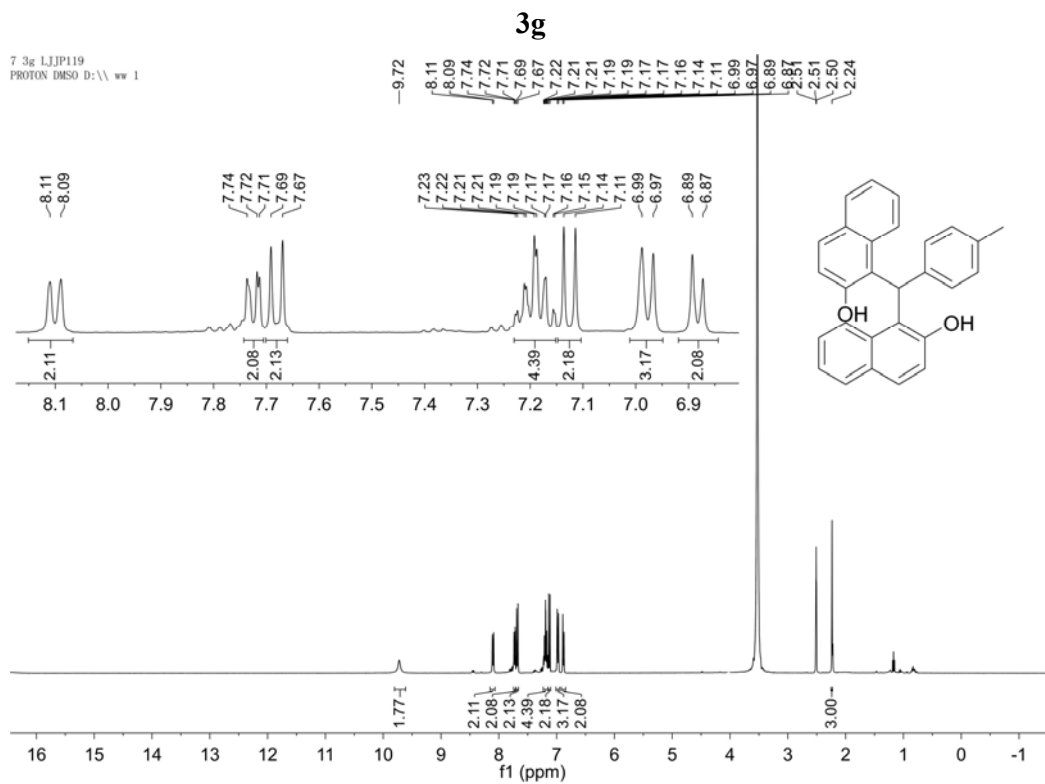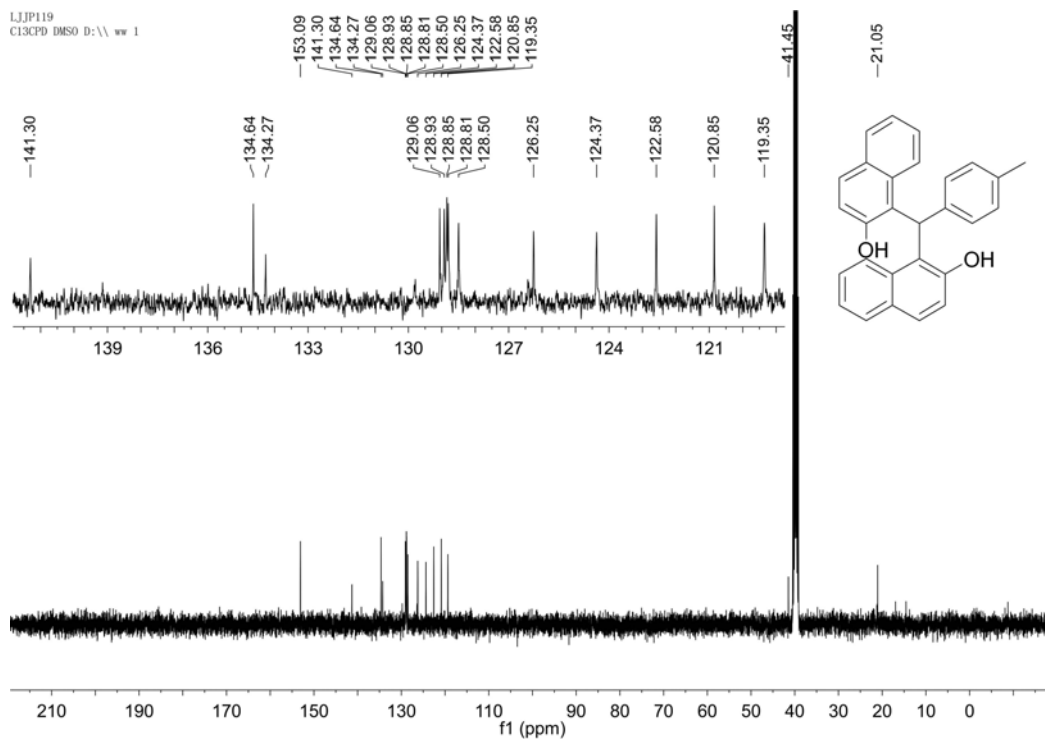

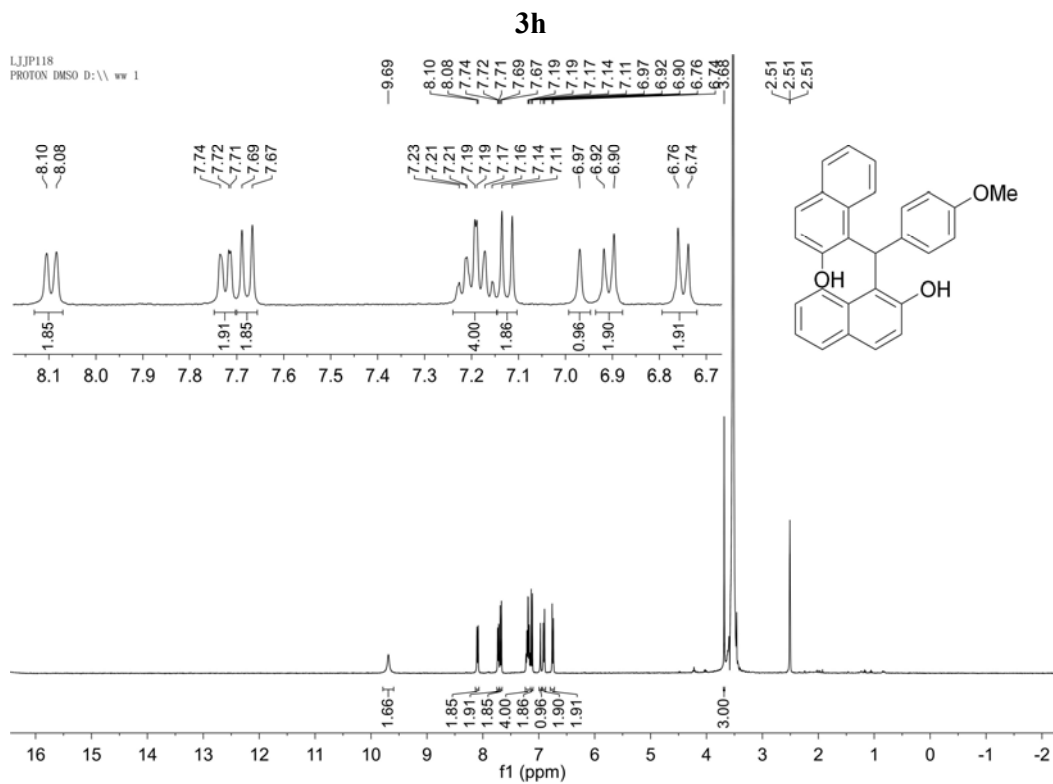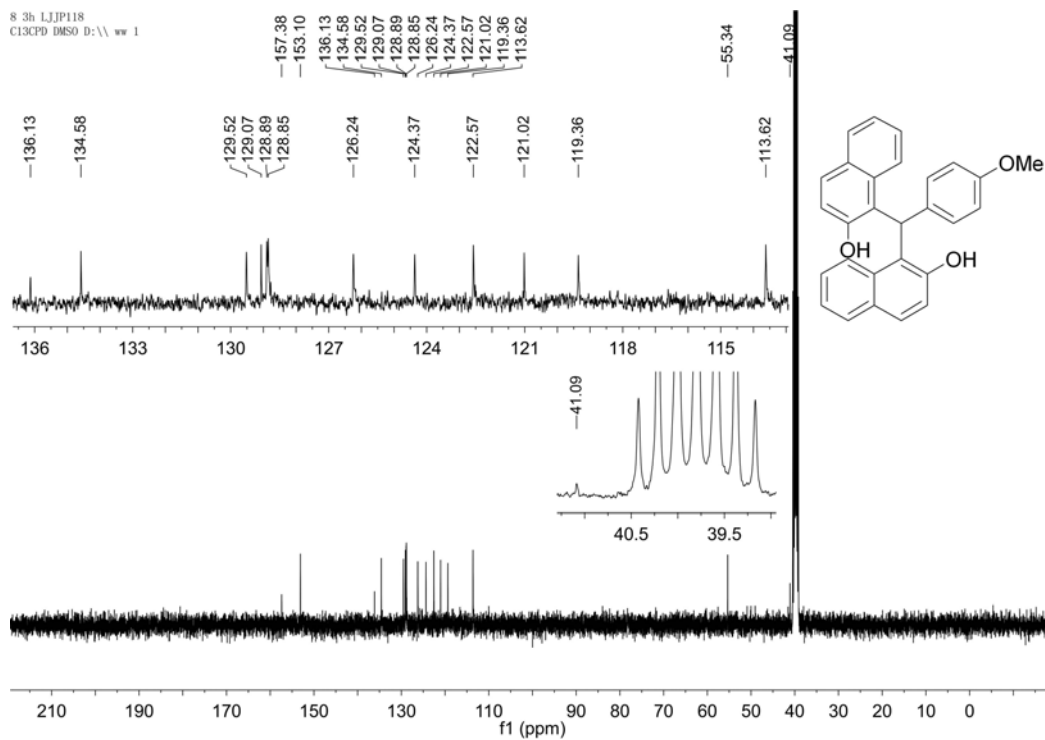

# 3k

LJJ93 a

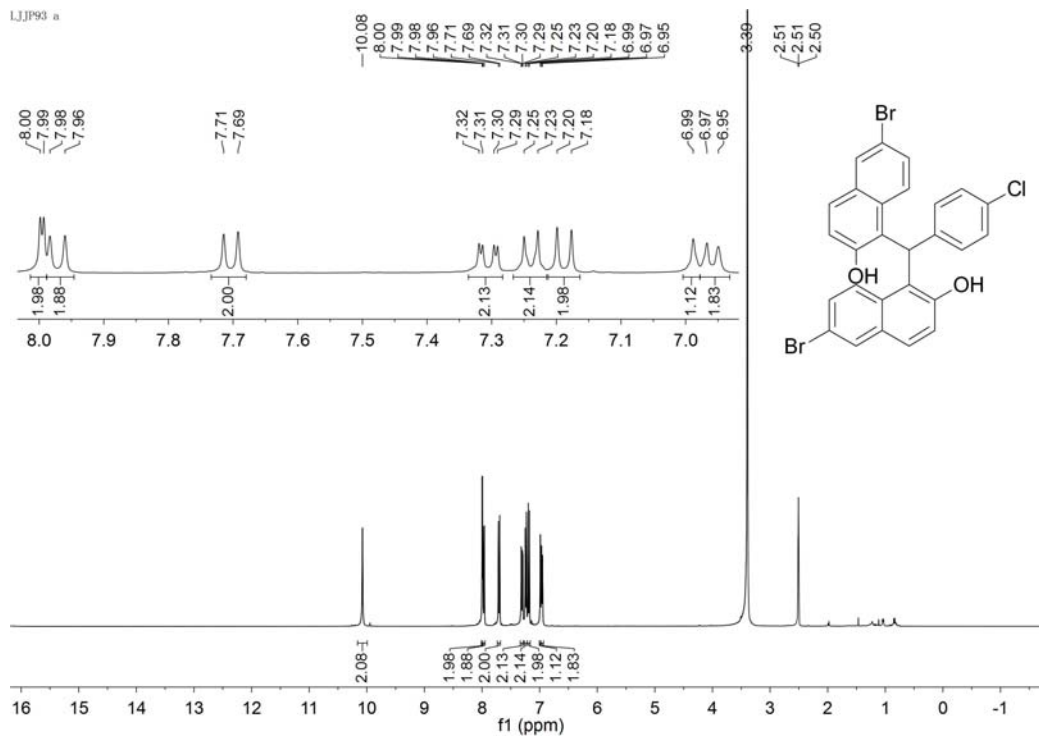

LJJ93 a

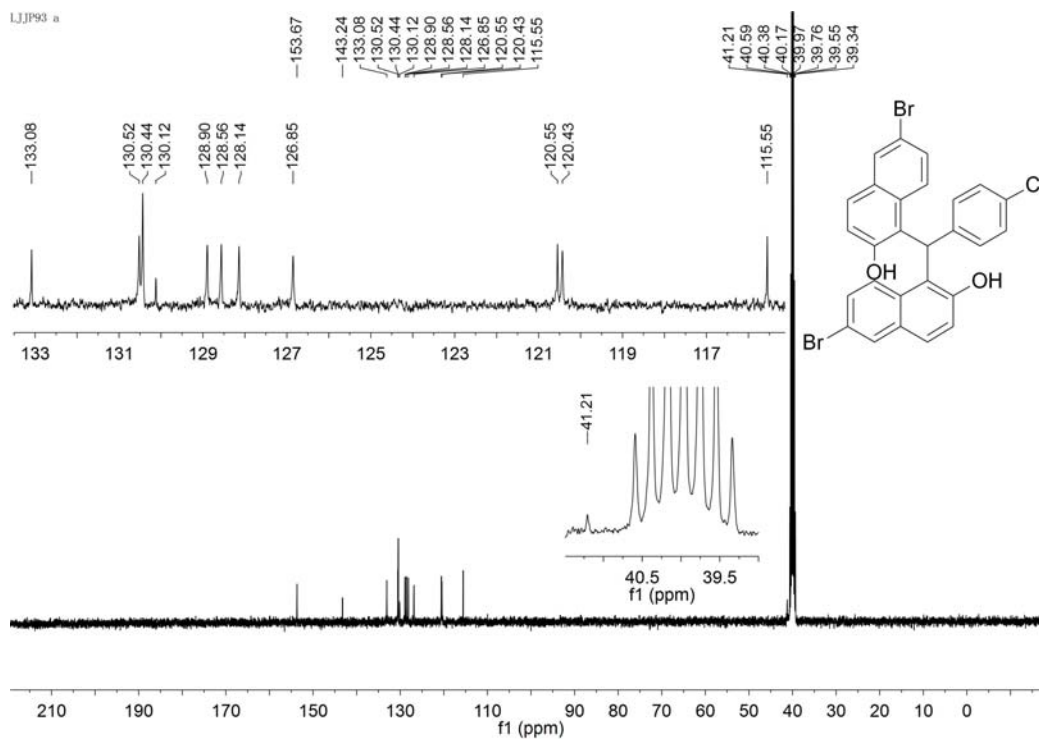

31

20140131JJF85-d6

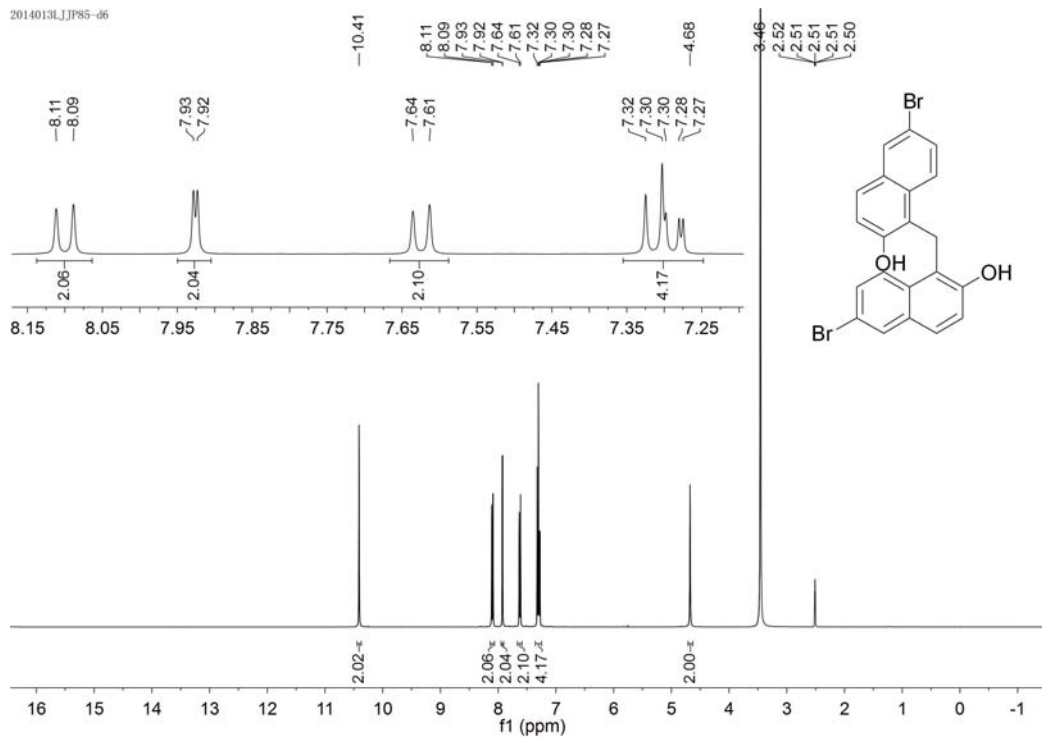

13 31 C 1jip85-DMSO

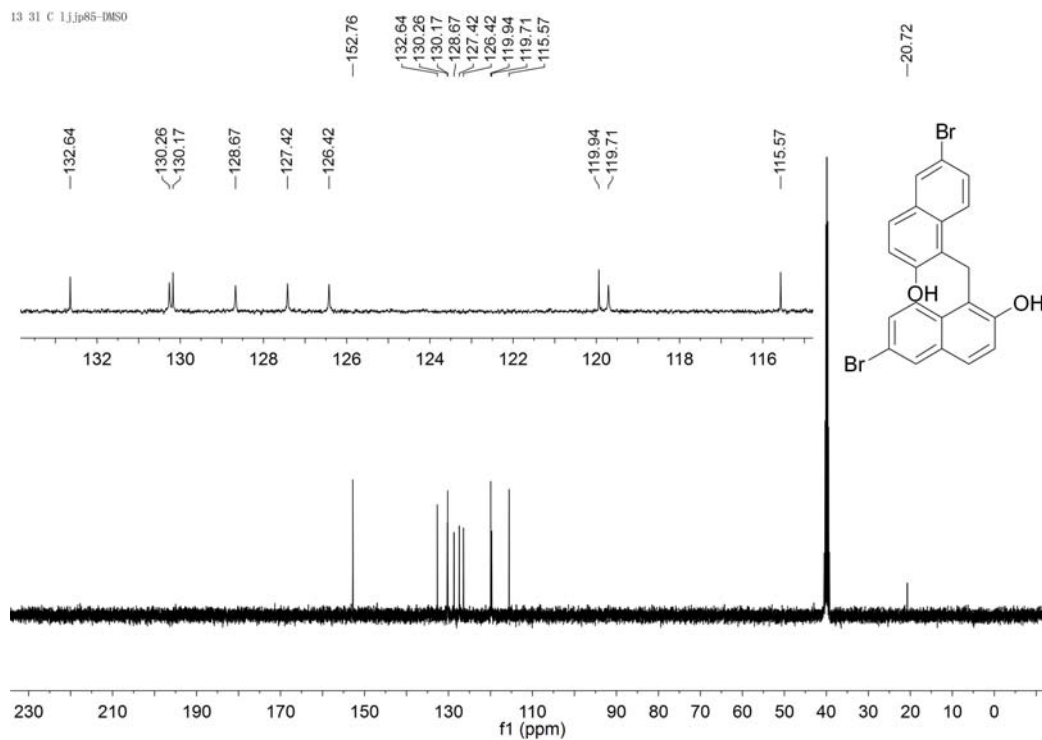

Supplement: Supplementary file 1 [file 3673752]
